# Supplementary material
Source: Springer Nature journal article supplement (https://www.springermedizin.de/resource/supplementary/12955_2007_486_MOESM1_ESM.pdf/9560558)

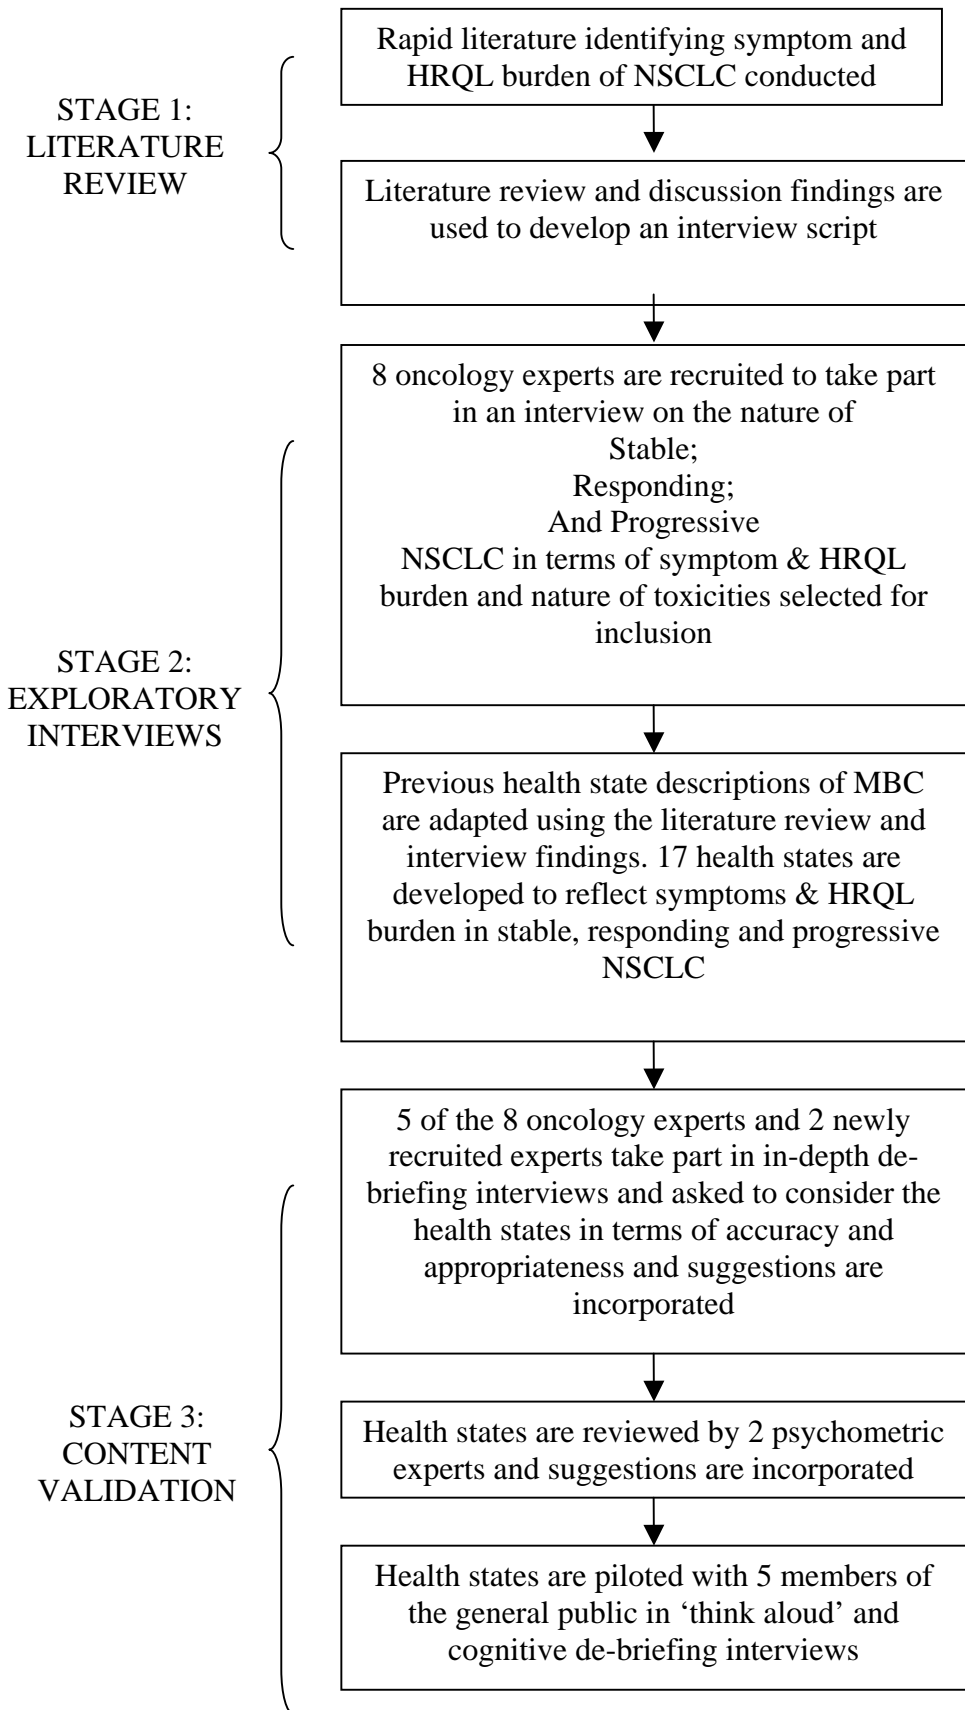

Supplement: MOESM1 [file 9560558]
